# Supplementary material for: TLC Screening for Antioxidant Activity of Extracts from Fifteen Bamboo Species and Identification of Antioxidant Flavone Glycosides from Leaves of Bambusa. textilis McClure
Source: Molecules. 2012 Oct 19;17(10):12297–311. doi: 10.3390/molecules171012297 (PMC6268801; doi:10.3390/molecules171012297)

# Supplementary Materials

Figure S1.  $^1\text{H}$ -NMR of compound 1.

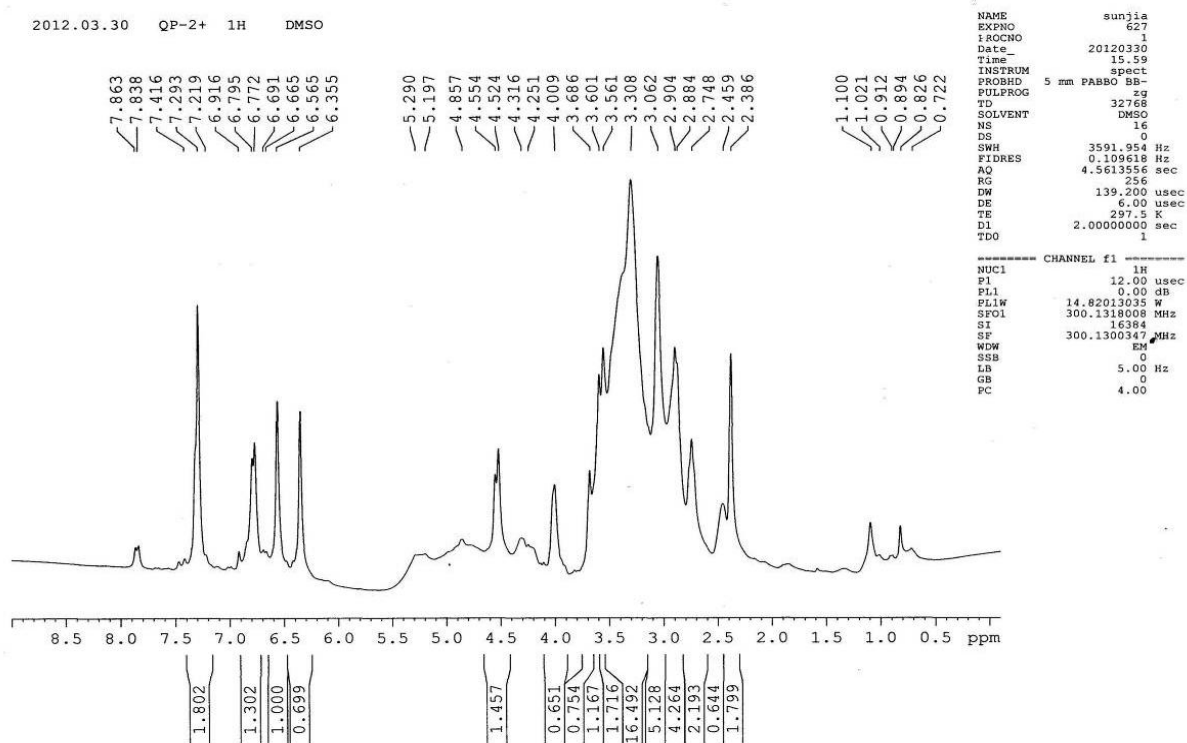

Figure S2.  $^{13}\text{C}$ -NMR of compound 1.

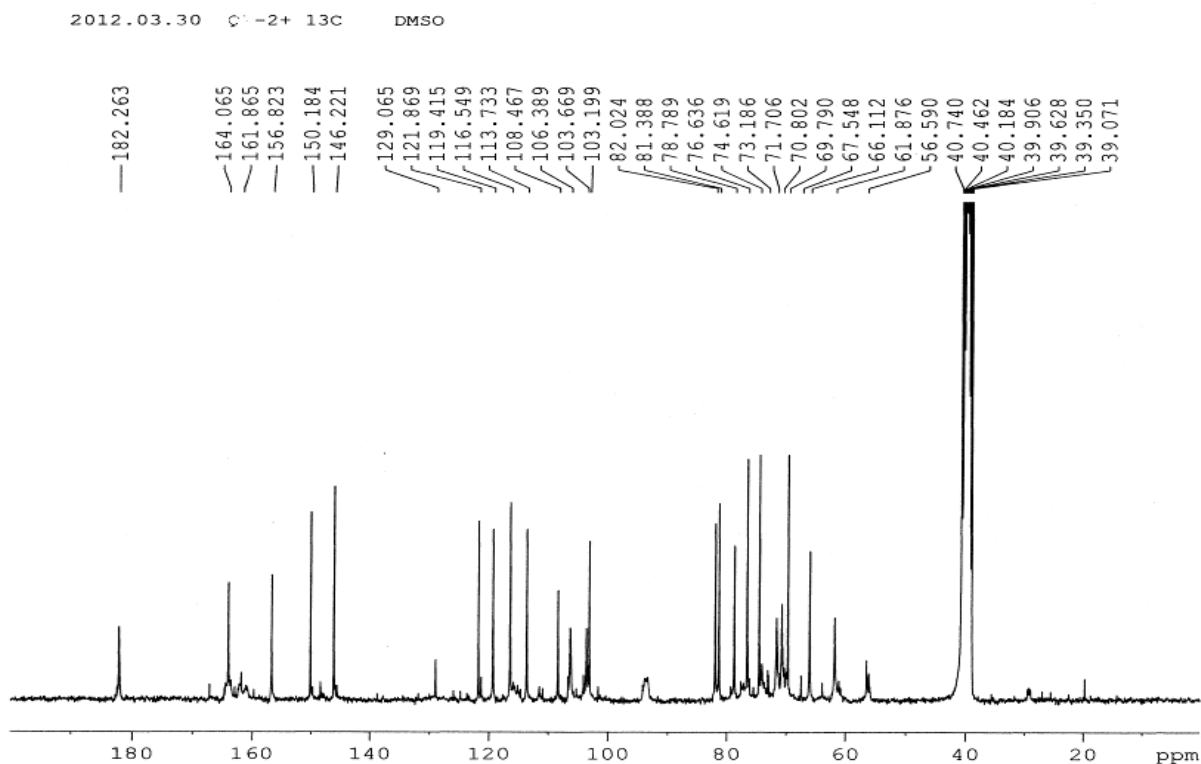

**Figure S3.** DEPT 135 NMR spectrum for compound 1.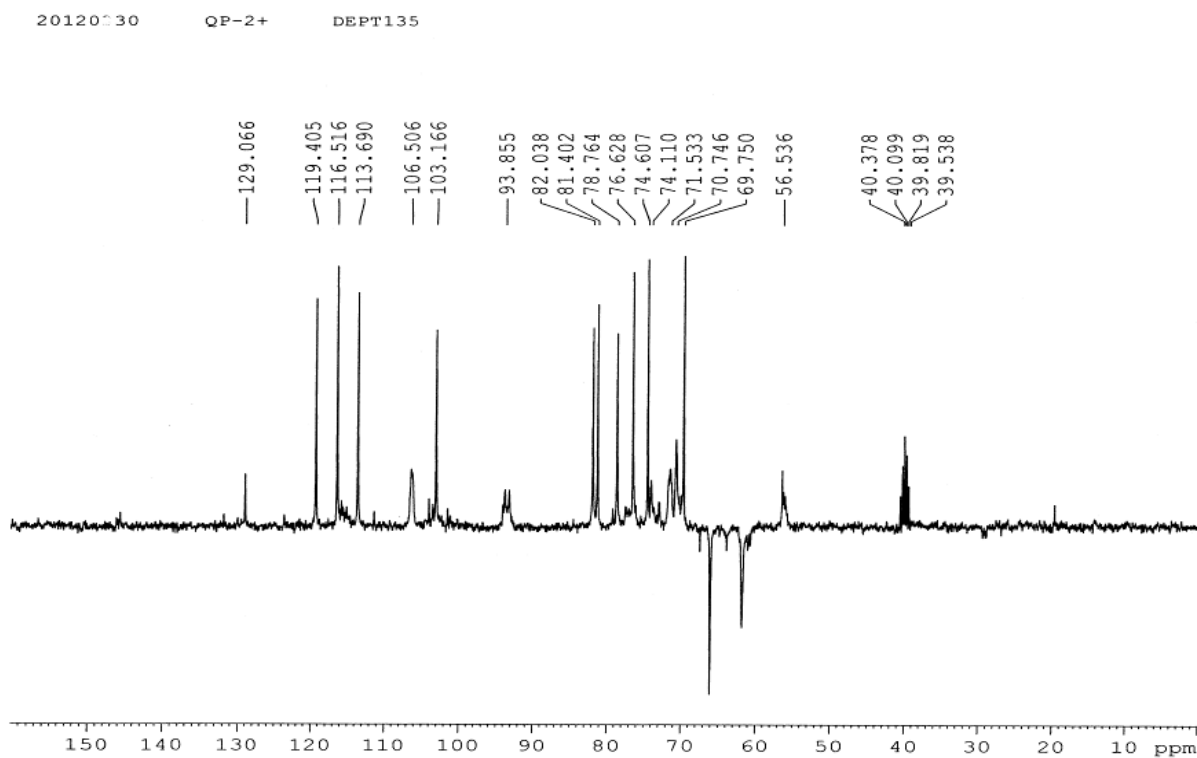**Figure S4.** DEPT 90 NMR spectrum for compound 1.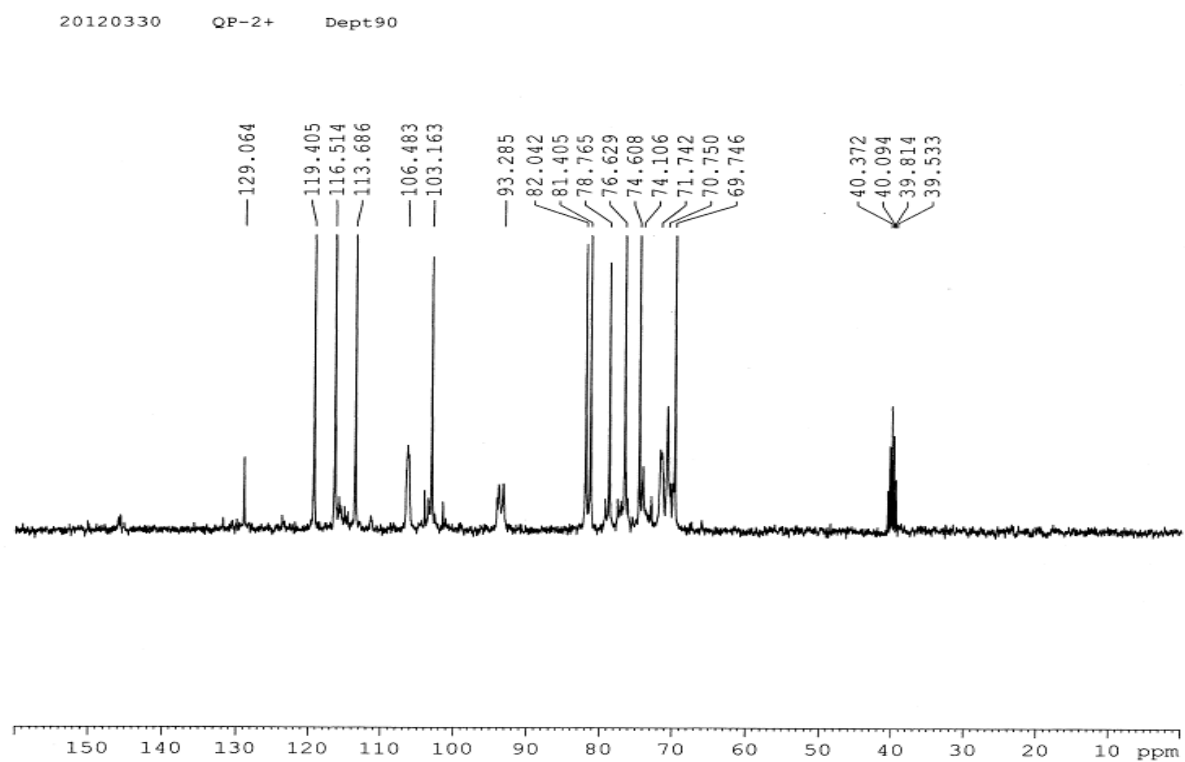

**Figure S5.**  $^1\text{H}$ -NMR of compound 2.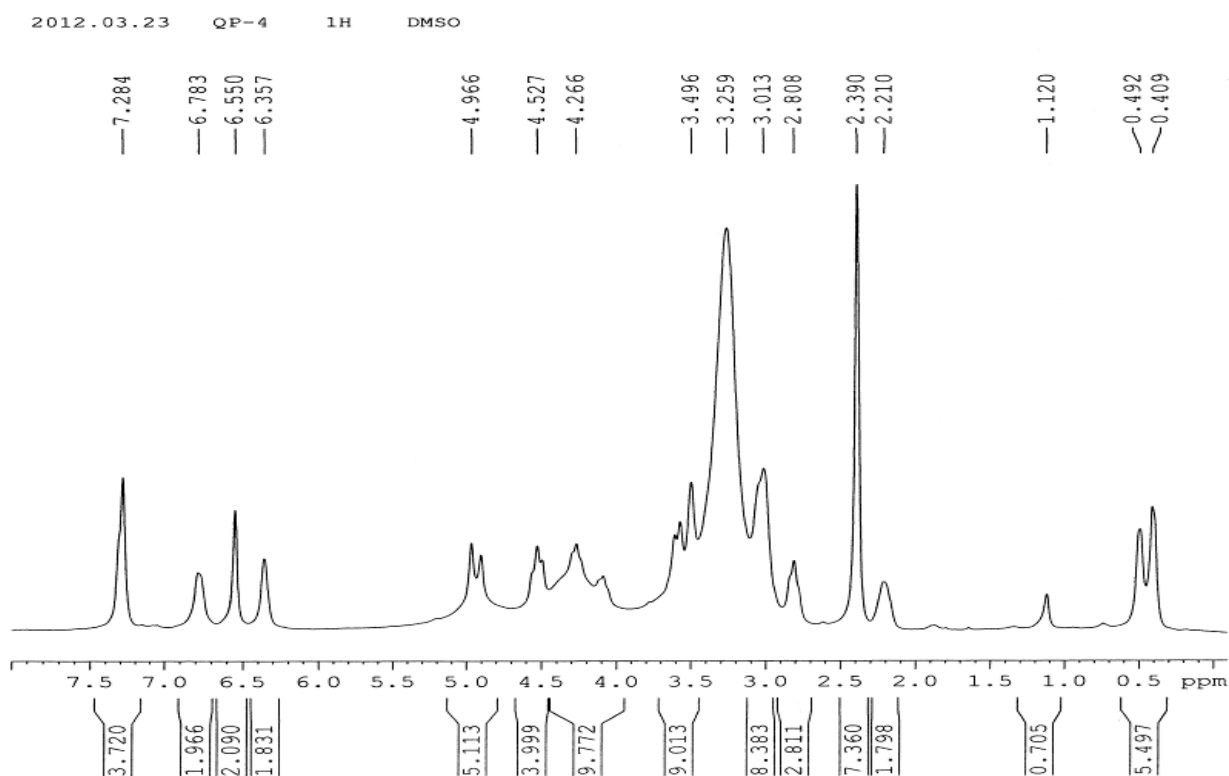**Figure S6.**  $^{13}\text{C}$ -NMR of compound 2.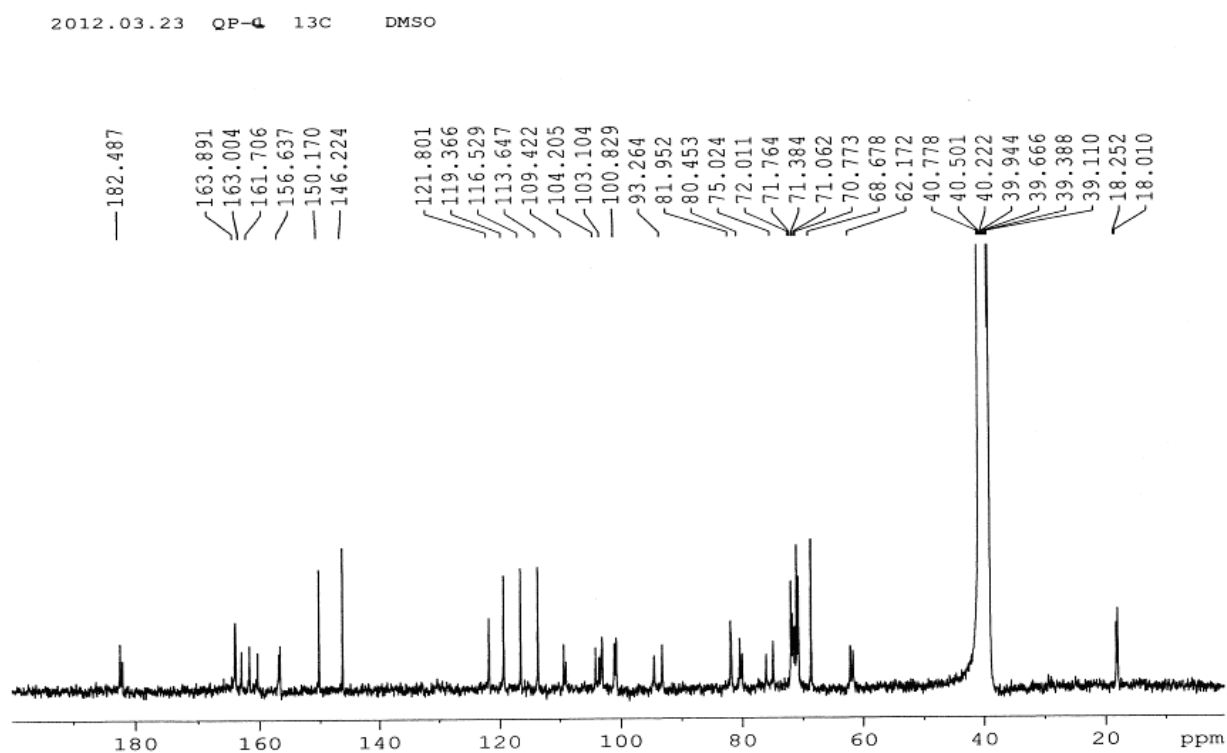

**Figure S7.** DEPT 135 NMR spectrum for compound 2.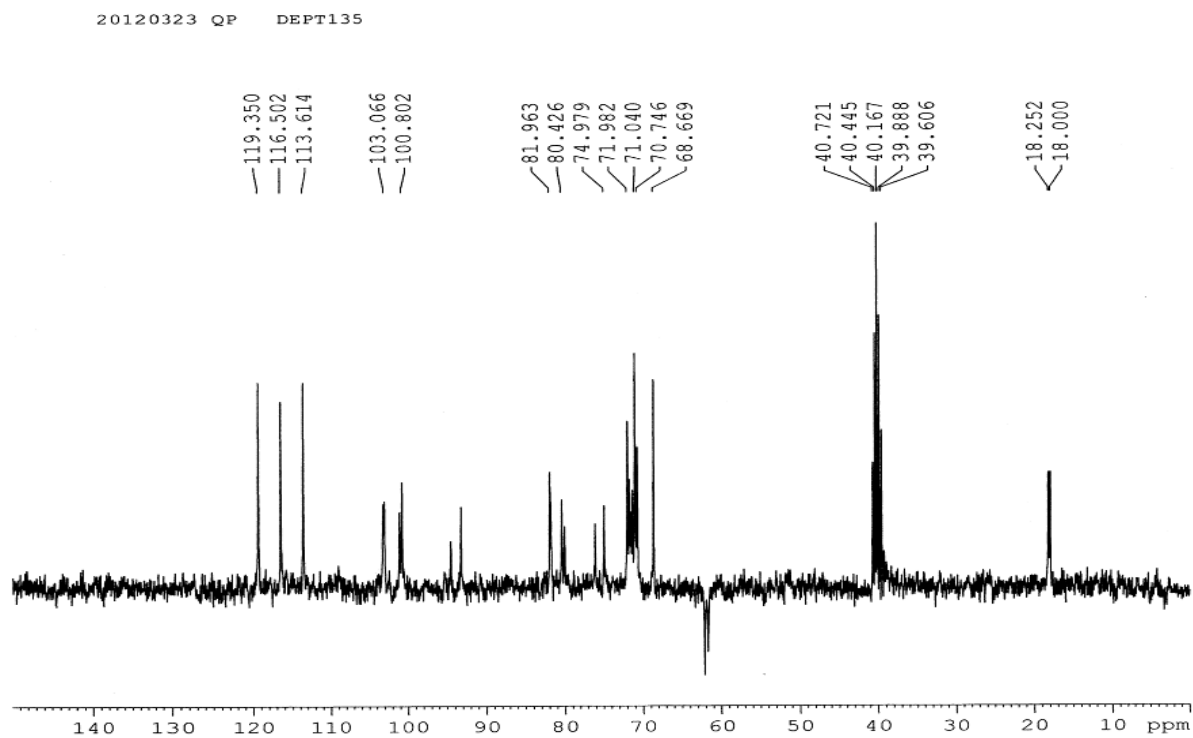**Figure S8.** DEPT 90 NMR spectrum for compound 2.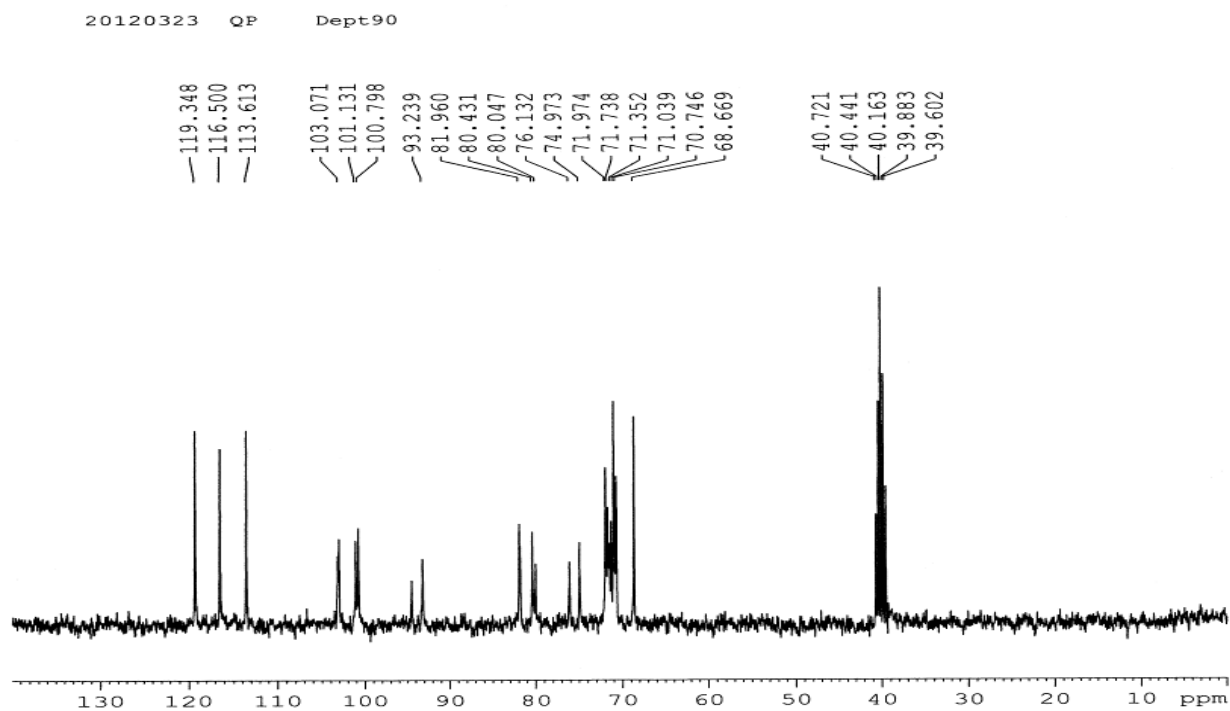

Supplement: Supplementary file 1 [file molecules-17-12297-s001.pdf]
